# Supplementary material for: Focusing on Families and Visitors Reduces Healthcare Associated Respiratory Viral Infections in a Neonatal Intensive Care Unit
Source: PubMed Central journal article supplement — Pediatr Qual Saf. 2019 Dec 16;4(6):e242. doi: 10.1097/pq9.0000000000000242 (PMC6946222; doi:10.1097/pq9.0000000000000242), 2019-12-16
Supplement: pqs-4-e242-s001.pdf [file pqs-4-e242-s001.pdf]

## Family/Visitor Hand Hygiene Compliance and Intervention Audit

Please complete questions 1-3 for each separate visitation on a single patient – THANK YOU!

---

DATE:                      SHIFT (circle one):    7A        7P        POD (circle one):    1        2        3

---

No family at bedside this shift

---

1. Was hand hygiene (HH) completed IMMEDIATELY prior to handling patient?

YES  If yes did they use: Soap/water  Hand gel  NO

2. Did RN intervene (see optional scripts below)?

YES  If yes, did parent complete HH? NO  YES  Soap/water  Hand gel

NO

3. Did RN do parent/visitor HH education? YES  NO

---

1. Was hand hygiene (HH) completed IMMEDIATELY prior to handling patient?

YES  If yes did they use: Soap/water  Hand gel  NO

2. Did RN intervene (see optional scripts below)?

YES  If yes, did parent complete HH? NO  YES  Soap/water  Hand gel

NO

3. Did RN do parent/visitor HH education? YES  NO

---

### Optional scripts for intervening before parents/ visitors touch baby:

“Hand washing before touching your baby is the single most important thing you can do to protect them. Here’s some gel for your hands.”

“Can I get you to rub some of this gel on your hands before touching your baby? This is the easiest and most important thing you can do to keep from spreading germs. “

“One of the best ways that you can help to keep your baby safe from infection is by washing your hands just before touching him/her. That’s why we keep the hand gel at each bed space”
