# Supplementary material for: Focusing on Families and Visitors Reduces Healthcare Associated Respiratory Viral Infections in a Neonatal Intensive Care Unit
Source: PubMed Central journal article supplement — Pediatr Qual Saf. 2019 Dec 16;4(6):e242. doi: 10.1097/pq9.0000000000000242 (PMC6946222; doi:10.1097/pq9.0000000000000242), 2019-12-16
Supplement: pqs-4-e242-s002.pdf [file pqs-4-e242-s002.pdf]

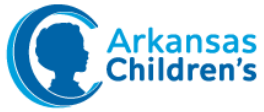

HOSPITALS · RESEARCH · FOUNDATION

**Visitor Screening Log**

**Department:** \_\_\_\_\_

- Visitor is defined as any person who is not the parent or primary caregiver. Siblings of the patient are considered visitors. See “Visitor Policy” in Policy Box for further details.
- All visitors to inpatient care areas/departments will be screened for signs and symptoms of illness on a daily basis.
- Any visitor with signs and symptoms will be asked to defer visiting until they are symptom free for 24 hours.

| Date | Time | Room Number | Name of Visitor/ or “Deferred” if Wellness Screen is not cleared<br><br><b>PRINT NAME</b> | Signature of Visitor | Number of Children Under 18 Years Old | To Be Filled Out by the Unit Staff                   |                                          |                                             |
|------|------|-------------|-------------------------------------------------------------------------------------------|----------------------|---------------------------------------|------------------------------------------------------|------------------------------------------|---------------------------------------------|
|      |      |             |                                                                                           |                      |                                       | Wellness Screen Completed<br><b>(staff Initials)</b> | Wellness Screen Clearance<br>(Yes or No) | Reminded about Hand Hygiene*<br>(Yes or No) |
|      |      |             |                                                                                           |                      |                                       |                                                      | Y / N                                    | Y / N                                       |
|      |      |             |                                                                                           |                      |                                       |                                                      | Y / N                                    | Y / N                                       |
|      |      |             |                                                                                           |                      |                                       |                                                      | Y / N                                    | Y / N                                       |
|      |      |             |                                                                                           |                      |                                       |                                                      | Y / N                                    | Y / N                                       |
|      |      |             |                                                                                           |                      |                                       |                                                      | Y / N                                    | Y / N                                       |
|      |      |             |                                                                                           |                      |                                       |                                                      | Y / N                                    | Y / N                                       |
|      |      |             |                                                                                           |                      |                                       |                                                      | Y / N                                    | Y / N                                       |

\*Please remind family/visitors to perform hand hygiene before going into and when leaving patient’s room (Or just before touching their baby in NICU)
